# Supplementary material for: Dual RNA-Seq Enables Full-Genome Assembly of Measles Virus and Characterization of Host–Pathogen Interactions
Source: MDPI journal article supplement (doi:10.3390/microorganisms9071538), 2021-07-20
Supplement: s1 [file s1]

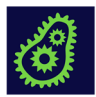

## Supplementary Material

# Dual-RNAseq enables full genome assembly of measles virus and characterization of host-pathogen interactions

Timokratis Karamitros <sup>1,2,\*</sup>, Vasiliki Pogka <sup>1,†</sup>, Gethsimani Papadopoulou <sup>2,3,†</sup>, Ourania Tsitsilonis <sup>3</sup>, Maria Evangelidou <sup>1</sup>, Styliani Sympardi <sup>4</sup> and Andreas Mentis <sup>1</sup>

<sup>1</sup> Public Health Laboratories, Department of Microbiology, Hellenic Pasteur Institute, 11521 Athens, Greece; vpoga@pasteur.gr (V.P.); meuagelidou@pasteur.gr (M.E.); mentis@pasteur.gr (A.M.)

<sup>2</sup> Bioinformatics and Applied Genomics Unit, Hellenic Pasteur Institute, 11521 Athens, Greece; gesthpap@pasteur.gr (G.P)

<sup>3</sup> Section of Animal and Human Physiology, Department of Biology, National and Kapodistrian University of Athens, 15784 Athens, Greece; rtsitsil@biol.uoa.gr (O.T.)

<sup>4</sup> 1st Department of Internal Medicine, Thriasion General Hospital, 19018 Elefsis, Greece; lianasympa@hotmail.com (S.S)

\* Correspondence: tkaram@pasteur.gr; Tel.: +30-2106478871

† Equally contributed

**Supplementary Table S1.****Differential Expressed genes in the pharyngeal epithelium**

| <b>geneName</b> | <b>betaValue</b> | <b>pValue</b> | <b>qValue</b> |
|-----------------|------------------|---------------|---------------|
| IFIT1           | 7.213            | 2.99E-06      | 4.24E-04      |
| CLEC4E          | 6.998            | 3.33E-10      | 2.71E-07      |
| MCEMP1          | 6.992            | 9.51E-17      | 2.83E-13      |
| FCGR1A          | 6.532            | 1.41E-08      | 5.24E-06      |
| IFIT2           | 6.531            | 3.04E-05      | 2.30E-03      |
| FCGR1B          | 6.410            | 5.98E-06      | 6.76E-04      |
| CCL3L3          | 6.345            | 1.53E-09      | 9.12E-07      |
| FCER1G          | 6.300            | 4.05E-06      | 5.17E-04      |
| DSG3            | 6.278            | 3.78E-17      | 1.81E-13      |
| IFIT3           | 6.270            | 1.85E-05      | 1.65E-03      |
| DSC2            | 5.961            | 1.18E-09      | 7.53E-07      |
| CLEC2B          | 5.827            | 8.74E-07      | 1.63E-04      |
| OASL            | 5.825            | 1.57E-05      | 1.45E-03      |
| TNFAIP6         | 5.820            | 1.40E-06      | 2.31E-04      |
| HERC5           | 5.818            | 7.16E-05      | 4.21E-03      |
| C3AR1           | 5.441            | 3.15E-07      | 6.70E-05      |
| C1orf162        | 5.334            | 1.22E-04      | 6.03E-03      |
| SPRR2F          | 5.241            | 1.08E-05      | 1.06E-03      |
| LTF             | 5.232            | 8.28E-12      | 1.23E-08      |
| CLEC4D          | 5.224            | 9.05E-06      | 9.30E-04      |
| LY96            | 5.210            | 1.92E-06      | 2.90E-04      |
| BCL2A1          | 5.206            | 9.39E-09      | 3.65E-06      |
| IFI6            | 5.049            | 3.95E-05      | 2.71E-03      |
| MNDA            | 4.925            | 1.89E-07      | 4.70E-05      |
| HESX1           | 4.885            | 2.38E-09      | 1.25E-06      |
| CXorf21         | 4.880            | 5.10E-06      | 6.07E-04      |
| AQP9            | 4.791            | 7.53E-08      | 2.17E-05      |
| ZNF438          | 4.724            | 8.40E-05      | 4.72E-03      |
| BPIFA1          | 4.711            | 4.05E-17      | 1.81E-13      |
| DDX60L          | 4.705            | 1.30E-10      | 1.16E-07      |
| RSAD2           | 4.665            | 6.83E-06      | 7.44E-04      |
| CLEC4A          | 4.577            | 2.88E-09      | 1.43E-06      |
| FCGR3B          | 4.573            | 9.45E-07      | 1.69E-04      |
| CCRL2           | 4.572            | 3.38E-06      | 4.65E-04      |
| LMNB1           | 4.544            | 3.76E-06      | 4.94E-04      |
| CCL4L2          | 4.503            | 8.56E-05      | 4.78E-03      |
| EVI2A           | 4.482            | 4.37E-06      | 5.34E-04      |

|          |       |          |          |
|----------|-------|----------|----------|
| MUC2     | 4.467 | 1.91E-05 | 1.69E-03 |
| GIMAP4   | 4.456 | 6.80E-08 | 2.03E-05 |
| IFITM3   | 4.447 | 1.57E-05 | 1.45E-03 |
| CARD16   | 4.416 | 7.22E-11 | 7.17E-08 |
| SPRR2G   | 4.377 | 3.82E-05 | 2.68E-03 |
| GPR84    | 4.339 | 6.98E-05 | 4.18E-03 |
| SRGN     | 4.257 | 3.72E-05 | 2.66E-03 |
| GPR65    | 4.245 | 6.65E-06 | 7.34E-04 |
| LILRB2   | 4.173 | 9.08E-05 | 4.98E-03 |
| CD53     | 4.169 | 2.87E-08 | 9.49E-06 |
| CST7     | 4.167 | 1.86E-06 | 2.87E-04 |
| MCTP1    | 4.124 | 2.04E-04 | 8.31E-03 |
| OLR1     | 4.117 | 1.51E-04 | 6.82E-03 |
| IFITM2   | 4.116 | 2.67E-06 | 3.85E-04 |
| FFAR2    | 4.103 | 2.58E-05 | 2.08E-03 |
| FYB1     | 4.077 | 1.68E-05 | 1.54E-03 |
| FCAR     | 4.057 | 2.09E-06 | 3.11E-04 |
| GBP1P1   | 4.051 | 1.25E-04 | 6.05E-03 |
| P2RY14   | 4.038 | 2.77E-05 | 2.16E-03 |
| EVI2B    | 4.014 | 9.76E-05 | 5.22E-03 |
| NFIL3    | 4.008 | 1.37E-07 | 3.59E-05 |
| SELL     | 3.994 | 2.06E-07 | 4.98E-05 |
| CD177    | 3.994 | 9.58E-06 | 9.62E-04 |
| NTNG2    | 3.968 | 2.71E-05 | 2.14E-03 |
| AOAH     | 3.933 | 5.91E-05 | 3.69E-03 |
| FPR2     | 3.899 | 1.30E-04 | 6.17E-03 |
| AIM2     | 3.791 | 2.07E-04 | 8.34E-03 |
| CASP1    | 3.767 | 8.28E-09 | 3.49E-06 |
| NBN      | 3.747 | 1.59E-04 | 7.04E-03 |
| NSMAF    | 3.740 | 2.12E-07 | 4.98E-05 |
| CMPK2    | 3.739 | 2.07E-04 | 8.34E-03 |
| FCGR2A   | 3.737 | 1.78E-04 | 7.52E-03 |
| S100A12  | 3.733 | 8.61E-09 | 3.49E-06 |
| FPR1     | 3.715 | 4.83E-06 | 5.83E-04 |
| SERPINB3 | 3.705 | 3.96E-11 | 5.06E-08 |
| DHRS12   | 3.698 | 1.39E-05 | 1.32E-03 |
| ALOX5AP  | 3.696 | 7.96E-06 | 8.46E-04 |
| FCGR3A   | 3.669 | 1.21E-04 | 6.03E-03 |
| IGSF6    | 3.659 | 6.34E-09 | 2.83E-06 |
| CCDC71L  | 3.629 | 8.97E-05 | 4.98E-03 |
| ADGRG3   | 3.623 | 1.44E-04 | 6.74E-03 |
| SERPINB7 | 3.609 | 5.44E-05 | 3.52E-03 |

|          |       |          |          |
|----------|-------|----------|----------|
| CXCR2    | 3.602 | 1.65E-04 | 7.22E-03 |
| TMEM71   | 3.590 | 1.05E-06 | 1.84E-04 |
| NCF2     | 3.586 | 1.14E-05 | 1.10E-03 |
| IFI44    | 3.526 | 1.01E-04 | 5.30E-03 |
| SDS      | 3.520 | 7.03E-05 | 4.19E-03 |
| TNFSF13B | 3.516 | 6.38E-07 | 1.24E-04 |
| DDX60    | 3.484 | 5.31E-06 | 6.12E-04 |
| SERPING1 | 3.471 | 7.45E-05 | 4.35E-03 |
| MS4A6A   | 3.470 | 2.12E-04 | 8.42E-03 |
| CLEC7A   | 3.461 | 5.39E-05 | 3.52E-03 |
| PLAUR    | 3.409 | 9.09E-05 | 4.98E-03 |
| ANKRD22  | 3.404 | 5.04E-07 | 1.02E-04 |
| TYROBP   | 3.392 | 4.32E-06 | 5.34E-04 |
| DYNAP    | 3.388 | 5.66E-05 | 3.62E-03 |
| PNRC1    | 3.380 | 2.76E-07 | 6.15E-05 |
| RARRES1  | 3.370 | 6.77E-05 | 4.08E-03 |
| TMEM140  | 3.342 | 3.76E-06 | 4.94E-04 |
| TLR4     | 3.331 | 2.28E-04 | 8.85E-03 |
| STATH    | 3.300 | 5.01E-10 | 3.73E-07 |
| LRRK2    | 3.256 | 2.40E-04 | 9.07E-03 |
| IFIH1    | 3.229 | 5.91E-05 | 3.69E-03 |
| MS4A7    | 3.205 | 8.24E-05 | 4.69E-03 |
| PLEK     | 3.204 | 1.05E-04 | 5.44E-03 |
| ACSL1    | 3.203 | 1.27E-05 | 1.22E-03 |
| PILRA    | 3.160 | 8.41E-07 | 1.60E-04 |
| CYSLTR1  | 3.138 | 1.12E-07 | 3.07E-05 |
| NT5C3A   | 3.114 | 1.52E-07 | 3.89E-05 |
| RGS18    | 3.114 | 2.35E-04 | 8.94E-03 |
| GBP3     | 3.085 | 4.34E-06 | 5.34E-04 |
| ASPRV1   | 3.068 | 1.72E-04 | 7.39E-03 |
| SERPINA1 | 3.062 | 6.22E-08 | 1.92E-05 |
| ARL5B    | 3.058 | 2.82E-07 | 6.15E-05 |
| SULT1B1  | 3.047 | 6.01E-05 | 3.71E-03 |
| LYRM1    | 3.035 | 2.65E-07 | 6.08E-05 |
| LYSMD2   | 2.985 | 6.62E-06 | 7.34E-04 |
| TNFSF10  | 2.946 | 1.44E-04 | 6.74E-03 |
| NAIP     | 2.910 | 8.33E-05 | 4.71E-03 |
| CREM     | 2.909 | 2.85E-05 | 2.20E-03 |
| SNX20    | 2.889 | 2.71E-05 | 2.14E-03 |
| FAS      | 2.862 | 5.12E-05 | 3.36E-03 |
| C19orf38 | 2.847 | 2.58E-04 | 9.59E-03 |
| TXNDC12  | 2.785 | 1.24E-04 | 6.04E-03 |

|          |        |          |          |
|----------|--------|----------|----------|
| TMEM123  | 2.745  | 4.62E-05 | 3.10E-03 |
| NINJ1    | 2.739  | 4.34E-05 | 2.94E-03 |
| FBXL5    | 2.738  | 1.51E-04 | 6.82E-03 |
| VAMP5    | 2.713  | 3.89E-05 | 2.70E-03 |
| PGS1     | 2.710  | 1.45E-04 | 6.76E-03 |
| KCNJ15   | 2.707  | 3.43E-05 | 2.53E-03 |
| GOLGA4   | 2.696  | 7.77E-05 | 4.51E-03 |
| CXCL2    | 2.684  | 1.49E-04 | 6.82E-03 |
| CREG1    | 2.667  | 7.63E-06 | 8.22E-04 |
| LYST     | 2.667  | 1.17E-04 | 5.99E-03 |
| FAM49B   | 2.661  | 1.58E-05 | 1.45E-03 |
| RAB20    | 2.651  | 8.22E-06 | 8.64E-04 |
| PTEN     | 2.589  | 1.81E-04 | 7.61E-03 |
| PLA2G7   | 2.566  | 2.01E-04 | 8.27E-03 |
| TRIM38   | 2.544  | 2.59E-05 | 2.08E-03 |
| RIPK2    | 2.542  | 2.35E-05 | 1.97E-03 |
| SOD2     | 2.530  | 1.63E-06 | 2.65E-04 |
| HERC6    | 2.512  | 2.57E-04 | 9.59E-03 |
| FNDC3B   | 2.491  | 1.21E-04 | 6.03E-03 |
| S100A7   | 2.485  | 1.76E-04 | 7.49E-03 |
| TNFAIP3  | 2.460  | 3.62E-05 | 2.63E-03 |
| DDIT3    | 2.429  | 1.07E-04 | 5.52E-03 |
| BLOC1S2  | 2.423  | 3.07E-05 | 2.31E-03 |
| JMJD1C   | 2.397  | 2.78E-05 | 2.16E-03 |
| TDP2     | 2.391  | 3.18E-05 | 2.36E-03 |
| CASP4    | 2.388  | 8.36E-06 | 8.69E-04 |
| DHX29    | 2.380  | 1.57E-04 | 7.00E-03 |
| RTP4     | 2.375  | 3.77E-05 | 2.67E-03 |
| ATG3     | 2.327  | 3.69E-05 | 2.66E-03 |
| HACD4    | 2.311  | 1.25E-04 | 6.05E-03 |
| USP15    | 2.280  | 9.54E-05 | 5.13E-03 |
| TXNIP    | 2.279  | 1.47E-04 | 6.82E-03 |
| IVNS1ABP | 2.204  | 3.97E-05 | 2.71E-03 |
| AKAP9    | 2.201  | 1.44E-04 | 6.74E-03 |
| VASP     | 2.190  | 9.17E-05 | 4.99E-03 |
| EIF1B    | 2.151  | 1.70E-04 | 7.39E-03 |
| CIR1     | 2.115  | 2.34E-04 | 8.92E-03 |
| CLTC     | 2.110  | 1.84E-04 | 7.68E-03 |
| SH3GLB1  | 2.110  | 1.23E-04 | 6.04E-03 |
| RILPL2   | 2.005  | 1.51E-04 | 6.82E-03 |
| PLXNA3   | -1.458 | 1.71E-04 | 7.39E-03 |
| TUFT1    | -2.093 | 2.34E-04 | 8.92E-03 |

|          |        |          |          |
|----------|--------|----------|----------|
| PDLIM1   | -2.190 | 1.62E-04 | 7.12E-03 |
| MTRNR2L4 | -2.194 | 1.03E-04 | 5.33E-03 |
| ACTN4    | -2.213 | 1.27E-04 | 6.08E-03 |
| ARL4C    | -2.237 | 4.92E-05 | 3.26E-03 |
| CARD11   | -2.262 | 2.33E-04 | 8.92E-03 |
| PIK3IP1  | -2.421 | 2.68E-04 | 9.89E-03 |
| MT-ND1   | -2.433 | 1.72E-04 | 7.39E-03 |
| WFDC2    | -2.516 | 3.84E-05 | 2.68E-03 |
| CLUH     | -2.547 | 8.17E-05 | 4.68E-03 |
| MTATP6P1 | -2.607 | 1.68E-06 | 2.67E-04 |
| SIRT3    | -2.619 | 5.68E-05 | 3.62E-03 |
| TACSTD2  | -2.651 | 3.30E-06 | 4.60E-04 |
| MT-CO3   | -2.698 | 2.54E-05 | 2.08E-03 |
| MT-CO1   | -2.734 | 1.02E-04 | 5.31E-03 |
| FBXW4    | -2.770 | 2.41E-04 | 9.07E-03 |
| ITPR3    | -2.806 | 2.02E-04 | 8.30E-03 |
| DZIP1L   | -2.808 | 1.48E-04 | 6.82E-03 |
| MUC4     | -2.809 | 1.82E-05 | 1.64E-03 |
| ZBTB4    | -2.848 | 2.20E-05 | 1.89E-03 |
| LCN2     | -2.857 | 2.69E-04 | 9.89E-03 |
| LGALS3   | -2.859 | 3.57E-05 | 2.62E-03 |
| CXCL3    | -3.444 | 1.29E-04 | 5.73E-03 |
| CREG2    | -3.579 | 1.30E-04 | 5.76E-03 |
| LYST     | -3.713 | 1.31E-04 | 5.78E-03 |
| FAM49B   | -3.847 | 1.31E-04 | 5.81E-03 |
| RAB21    | -3.982 | 1.32E-04 | 5.83E-03 |
| PTEN     | -4.116 | 1.33E-04 | 5.86E-03 |
| PLA2G8   | -4.250 | 1.34E-04 | 5.89E-03 |
| TRIM39   | -4.384 | 1.34E-04 | 5.91E-03 |
| RIPK3    | -4.519 | 1.35E-04 | 5.94E-03 |
| SOD3     | -4.653 | 1.36E-04 | 5.96E-03 |
| HERC7    | -4.787 | 1.37E-04 | 5.99E-03 |
| FNDC3B   | -4.922 | 1.37E-04 | 6.01E-03 |
| S100A8   | -5.056 | 1.38E-04 | 6.04E-03 |
| TNFAIP4  | -5.190 | 1.39E-04 | 6.06E-03 |
| DDIT4    | -5.325 | 1.40E-04 | 6.09E-03 |
| BLOC1S3  | -5.459 | 1.40E-04 | 6.11E-03 |
| JMJD1C   | -5.593 | 1.41E-04 | 6.14E-03 |
| TDP3     | -5.728 | 1.42E-04 | 6.17E-03 |
| CASP5    | -5.862 | 1.43E-04 | 6.19E-03 |
| DHX30    | -5.996 | 1.43E-04 | 6.22E-03 |
| RTP5     | -6.131 | 1.44E-04 | 6.24E-03 |

|          |         |          |          |
|----------|---------|----------|----------|
| ATG4     | -6.265  | 1.45E-04 | 6.27E-03 |
| HACD5    | -6.399  | 1.46E-04 | 6.29E-03 |
| USP16    | -6.533  | 1.46E-04 | 6.32E-03 |
| TXNIP    | -6.668  | 1.47E-04 | 6.34E-03 |
| IVNS1ABP | -6.802  | 1.48E-04 | 6.37E-03 |
| AKAP10   | -6.936  | 1.49E-04 | 6.40E-03 |
| VASP     | -7.071  | 1.49E-04 | 6.42E-03 |
| EIF1B    | -7.205  | 1.50E-04 | 6.45E-03 |
| CIR2     | -7.339  | 1.51E-04 | 6.47E-03 |
| CLTC     | -7.474  | 1.52E-04 | 6.50E-03 |
| SH3GLB2  | -7.608  | 1.52E-04 | 6.52E-03 |
| RILPL3   | -7.742  | 1.53E-04 | 6.55E-03 |
| PLXNA4   | -7.877  | 1.54E-04 | 6.57E-03 |
| TUFT2    | -8.011  | 1.55E-04 | 6.60E-03 |
| PDLIM2   | -8.145  | 1.55E-04 | 6.62E-03 |
| MTRNR2L5 | -8.279  | 1.56E-04 | 6.65E-03 |
| ACTN5    | -8.414  | 1.57E-04 | 6.68E-03 |
| ARL4C    | -8.548  | 1.58E-04 | 6.70E-03 |
| CARD12   | -8.682  | 1.58E-04 | 6.73E-03 |
| PIK3IP2  | -8.817  | 1.59E-04 | 6.75E-03 |
| MT-ND2   | -8.951  | 1.60E-04 | 6.78E-03 |
| WFDC3    | -9.085  | 1.61E-04 | 6.80E-03 |
| CLUH     | -9.220  | 1.61E-04 | 6.83E-03 |
| MTATP6P2 | -9.354  | 1.62E-04 | 6.85E-03 |
| SIRT4    | -9.488  | 1.63E-04 | 6.88E-03 |
| TACSTD3  | -9.623  | 1.64E-04 | 6.91E-03 |
| MT-CO1   | -9.757  | 1.64E-04 | 6.93E-03 |
| MT-CO3   | -9.891  | 1.65E-04 | 6.96E-03 |
| FBXW5    | -10.026 | 1.66E-04 | 6.98E-03 |
| ITPR4    | -10.160 | 1.67E-04 | 7.01E-03 |
| DZIP1L   | -10.294 | 1.67E-04 | 7.03E-03 |
| MUC5     | -10.428 | 1.68E-04 | 7.06E-03 |
| ZBTB5    | -10.563 | 1.69E-04 | 7.08E-03 |
| LCN3     | -10.697 | 1.70E-04 | 7.11E-03 |
| LGALS4   | -10.831 | 1.70E-04 | 7.13E-03 |
| CXCL4    | -10.966 | 1.71E-04 | 7.16E-03 |
| CREG3    | -11.100 | 1.72E-04 | 7.19E-03 |
| LYST     | -11.234 | 1.73E-04 | 7.21E-03 |

**Supplementary Table 2.****Differential Expressed genes in PBMCs**

| <b>geneName</b> | <b>betaValue</b> | <b>pValue</b> | <b>qValue</b> |
|-----------------|------------------|---------------|---------------|
| IGHG1           | 5.076            | 1.27E-11      | 1.73E-08      |
| SKA3            | 4.394            | 1.69E-08      | 8.33E-06      |
| BIRC5           | 4.294            | 7.58E-14      | 2.47E-10      |
| SDC1            | 4.252            | 1.13E-08      | 6.17E-06      |
| RRM2            | 4.105            | 3.28E-11      | 3.57E-08      |
| CDT1            | 4.090            | 1.34E-10      | 1.21E-07      |
| IQGAP3          | 4.062            | 2.56E-11      | 2.98E-08      |
| CDC20           | 4.060            | 5.07E-16      | 4.01E-12      |
| MYBL2           | 4.025            | 7.38E-16      | 4.01E-12      |
| TYMS            | 4.004            | 1.15E-18      | 1.88E-14      |
| TK1             | 3.873            | 1.15E-15      | 4.69E-12      |
| TROAP           | 3.868            | 4.98E-12      | 7.38E-09      |
| CCIN            | 3.847            | 2.28E-06      | 6.40E-04      |
| KIFC1           | 3.786            | 1.16E-06      | 3.51E-04      |
| KIFC1           | 3.786            | 1.16E-06      | 3.51E-04      |
| ANLN            | 3.782            | 1.18E-05      | 2.67E-03      |
| CDCA5           | 3.775            | 1.33E-12      | 2.16E-09      |
| UBE2C           | 3.734            | 1.21E-13      | 3.29E-10      |
| PCLAF           | 3.715            | 1.22E-10      | 1.17E-07      |
| IGHGP           | 3.643            | 4.94E-05      | 8.18E-03      |
| CDC25A          | 3.639            | 1.79E-09      | 1.22E-06      |
| CENPA           | 3.637            | 2.91E-09      | 1.90E-06      |
| CDC45           | 3.634            | 6.62E-10      | 4.90E-07      |
| AURKB           | 3.599            | 1.74E-13      | 3.55E-10      |
| RNASE1          | 3.544            | 1.55E-05      | 3.29E-03      |
| PLK1            | 3.439            | 2.83E-10      | 2.31E-07      |
| KIF4A           | 3.414            | 4.96E-05      | 8.18E-03      |
| TUBB3           | 3.379            | 2.72E-06      | 7.53E-04      |
| KIF18B          | 3.318            | 1.75E-10      | 1.51E-07      |
| GALNT14         | 3.310            | 1.06E-06      | 3.46E-04      |
| SPC24           | 3.293            | 5.09E-09      | 3.19E-06      |
| TICRR           | 3.282            | 2.50E-08      | 1.20E-05      |
| CCNB2           | 3.213            | 2.35E-07      | 9.34E-05      |
| HJURP           | 3.206            | 3.81E-07      | 1.41E-04      |
| KIF20A          | 3.191            | 3.04E-05      | 5.77E-03      |
| PKMYT1          | 3.188            | 3.26E-10      | 2.53E-07      |
| ILDR2           | 3.168            | 6.92E-06      | 1.64E-03      |
| KIF2C           | 3.097            | 1.72E-07      | 7.19E-05      |

|          |       |          |          |
|----------|-------|----------|----------|
| GINS2    | 3.094 | 1.17E-07 | 5.16E-05 |
| KCNN3    | 3.077 | 3.98E-06 | 1.08E-03 |
| RAD51    | 3.077 | 1.06E-08 | 5.99E-06 |
| CDCA8    | 3.062 | 6.27E-09 | 3.65E-06 |
| IGHV3-49 | 3.034 | 6.43E-06 | 1.54E-03 |
| TPX2     | 3.028 | 1.61E-05 | 3.37E-03 |
| OIP5     | 3.026 | 2.02E-06 | 5.79E-04 |
| ORC1     | 3.016 | 5.30E-09 | 3.20E-06 |
| GTSE1    | 3.009 | 1.53E-07 | 6.58E-05 |
| NCAPH    | 2.999 | 2.05E-07 | 8.37E-05 |
| LAMC1    | 2.997 | 1.72E-06 | 5.00E-04 |
| ZWINT    | 2.977 | 1.58E-09 | 1.12E-06 |
| CDCA3    | 2.937 | 1.24E-08 | 6.32E-06 |
| ESPL1    | 2.925 | 3.22E-07 | 1.22E-04 |
| UHRF1    | 2.896 | 2.14E-11 | 2.68E-08 |
| HASPIN   | 2.841 | 6.99E-07 | 2.47E-04 |
| IGKV1-12 | 2.815 | 6.22E-05 | 9.94E-03 |
| GAPDHP72 | 2.786 | 5.31E-05 | 8.66E-03 |
| CCNB1    | 2.769 | 1.93E-05 | 3.88E-03 |
| DDN      | 2.753 | 4.24E-05 | 7.60E-03 |
| PYCR1    | 2.648 | 1.09E-06 | 3.47E-04 |
| TEDC2    | 2.630 | 1.53E-05 | 3.29E-03 |
| E2F1     | 2.621 | 2.90E-13 | 5.25E-10 |
| E2F2     | 2.592 | 3.94E-11 | 4.02E-08 |
| SLCO4A1  | 2.578 | 2.10E-05 | 4.18E-03 |
| CENPM    | 2.562 | 2.67E-07 | 1.04E-04 |
| MCM2     | 2.529 | 5.16E-08 | 2.41E-05 |
| KCNK5    | 2.465 | 4.13E-06 | 1.10E-03 |
| HMGB3    | 2.439 | 3.99E-05 | 7.23E-03 |
| IGHV4-34 | 2.408 | 3.31E-05 | 6.20E-03 |
| RGS16    | 2.382 | 3.92E-05 | 7.18E-03 |
| FOXM1    | 2.381 | 1.19E-08 | 6.27E-06 |
| CENPW    | 2.379 | 4.82E-05 | 8.10E-03 |
| ASF1B    | 2.288 | 6.28E-06 | 1.53E-03 |
| POC1A    | 2.193 | 7.54E-07 | 2.56E-04 |
| HIST1H1C | 2.139 | 1.54E-05 | 3.29E-03 |
| WDR62    | 1.984 | 1.23E-05 | 2.75E-03 |
| PTTG1    | 1.943 | 1.92E-05 | 3.88E-03 |
| UBE2S    | 1.924 | 1.55E-06 | 4.58E-04 |
| CD59     | 1.872 | 7.59E-08 | 3.44E-05 |
| SCD      | 1.845 | 1.15E-06 | 3.51E-04 |
| SLC1A4   | 1.719 | 3.70E-05 | 6.86E-03 |

|           |        |          |          |
|-----------|--------|----------|----------|
| TUBB4B    | 1.683  | 7.99E-06 | 1.86E-03 |
| TUBA1B    | 1.661  | 4.73E-05 | 8.04E-03 |
| TUBA1C    | 1.642  | 2.27E-05 | 4.46E-03 |
| TIMELESS  | 1.616  | 5.80E-06 | 1.43E-03 |
| DHCR24    | 1.580  | 4.95E-06 | 1.28E-03 |
| JPT1      | 1.414  | 4.36E-05 | 7.65E-03 |
| LTK       | -1.557 | 2.72E-05 | 5.22E-03 |
| SEMA4C    | -1.712 | 1.12E-05 | 2.57E-03 |
| CRIP2     | -2.025 | 4.65E-05 | 7.97E-03 |
| MS4A7     | -2.038 | 5.93E-05 | 9.58E-03 |
| RORC      | -2.230 | 4.60E-06 | 1.21E-03 |
| IGFBP3    | -2.539 | 2.52E-05 | 4.90E-03 |
| NT5E      | -2.548 | 4.62E-05 | 7.97E-03 |
| CD1C      | -2.599 | 9.89E-07 | 3.29E-04 |
| SIGLEC20P | -2.866 | 1.43E-05 | 3.15E-03 |
| FCER1A    | -2.919 | 4.45E-07 | 1.61E-04 |
| KNDC1     | -3.169 | 5.50E-06 | 1.38E-03 |
| CD207     | -3.385 | 1.75E-05 | 3.60E-03 |
| CROCC2    | -3.882 | 1.65E-13 | 3.55E-10 |
| CLEC4F    | -4.066 | 4.30E-05 | 7.61E-03 |
| DCANP1    | -4.184 | 5.25E-06 | 1.34E-03 |
| LYPD2     | -5.543 | 7.11E-07 | 2.47E-04 |
